# Supplementary material for: ‘Having a Quiet Word’: Yarning with Aboriginal Women in the Pilbara Region of Western Australia about Mental Health and Mental Health Screening during the Perinatal Period
Source: MDPI journal article supplement (doi:10.3390/ijerph16214253), 2019-11-01
Supplement: s1 [file s1]

# Kimberley Mum’s Mood Scale Part 2

Refer to the KMMS Manual for information on how to facilitate the yarn, guidelines for administration, examples of enquiring/exploring questions for each psychosocial domain, how to determine overall risk, and options for follow-up actions.

PART 1 SCORE:

NAME:

DOB:

DATE:

## EXPLORE THE WOMAN’S STORY, NOTING THE SITUATION AND HER PROTECTIVE AND RISK FACTORS

SUPPORT:

MAJOR STRESSORS:

SELF-ESTEEM / ANXIETY:

RELATIONSHIPS:

CHILDHOOD EXPERIENCES:

SUBSTANCE MISUSE:

SOCIAL, EMOTIONAL AND CULTURAL WELLBEING:

| OVERALL RISK OF DEPRESSION AND/OR ANXIETY (PLEASE TICK)                                                        |                                                 |  |
|----------------------------------------------------------------------------------------------------------------|-------------------------------------------------|--|
| Consider Part 1 score and the risk and protective factors identified during Part 2 in determining overall risk |                                                 |  |
| LOW                                                                                                            | Self-care recommended                           |  |
| MODERATE                                                                                                       | Clinical assessment within 1 week               |  |
| HIGH                                                                                                           | Clinical assessment required within 48–72 hours |  |
| IMMEDIATE CONCERNS                                                                                             | Clinical handover required immediately          |  |

FOLLOW-UP ACTIONS: Explore relevant referrals, or next steps with the woman.
