# Supplementary material for: ‘Having a Quiet Word’: Yarning with Aboriginal Women in the Pilbara Region of Western Australia about Mental Health and Mental Health Screening during the Perinatal Period
Source: Int J Environ Res Public Health. 2019 Nov 1;16(21):4253. doi: 10.3390/ijerph16214253 (PMC6862568; doi:10.3390/ijerph16214253)
Supplement: Supplementary file 1 [file ijerph-16-04253-s001.zip]

Archive with 4 entries (4 files):
- Supplementary Materials 1.pdf
- Supplementary Materials 2.pdf
- Supplementary Materials 3.pdf
- Supplementary Materials 4.pdf
